# Supplementary material
Source: PubMed Central journal article supplement (PMC2940243)
Supplement: btp288_2.pdf [file btp288_2.pdf]

# A tool for identification of genes expressed in patterns of interest using the Allen Brain Atlas: Supplementary Information

Fred P. Davis and Sean R. Eddy  
HHMI Janelia Farm Research Campus  
19700 Helix Dr, Ashburn, VA 20147  
davisf@janelia.hhmi.org  
<http://research.janelia.org/allenminer>

April 9, 2009

## References

- [1] Kurrasch, D. M. *et al.* (2007). The neonatal ventromedial hypothalamus transcriptome reveals novel markers with spatially distinct patterning. *J Neurosci*, **27**(50), 13624–13634.
- [2] Lein, E. S. *et al.* (2007). Genome-wide atlas of gene expression in the adult mouse brain. *Nature*, **445**(7124), 168–176.
- [3] Zirlinger, M. *et al.* (2001). Amygdala-enriched genes identified by microarray technology are restricted to specific amygdaloid subnuclei. *Proc Natl Acad Sci U S A*, **98**(9), 5270–5275.

## List of Figures

|   |                                                                          |   |
|---|--------------------------------------------------------------------------|---|
| 1 | Receiver-operator characteristic of ALLENMINER enrichment score. . . . . | 3 |
| 2 | Examples of ALLENMINER false negative errors. . . . .                    | 4 |
| 3 | Examples of ALLENMINER false positive errors. . . . .                    | 5 |
| 4 | Patterned expression in the caudoputamen. . . . .                        | 6 |

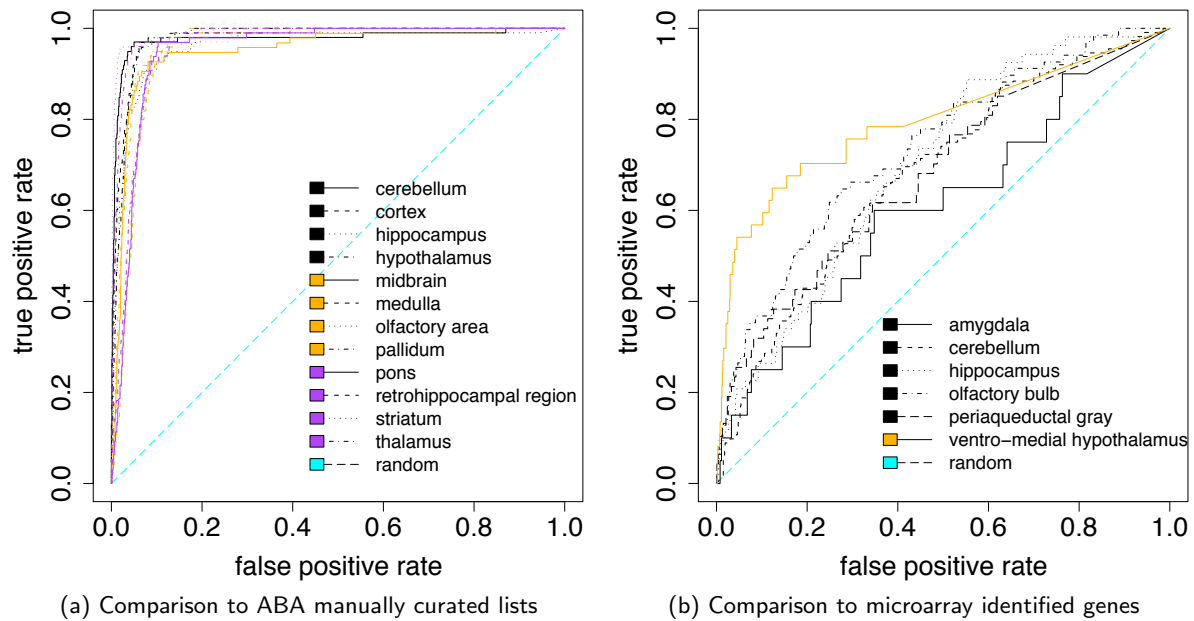

Figure 1: Receiver-operator characteristic of ALLENMINER enrichment score. ALLENMINER results were compared to (a) manually curated lists of genes enriched in 12 ABA brain regions [2] and (b) microarray-identified genes enriched in the cerebellum, amygdala, hippocampus, olfactory bulb, periaqueductal gray [3] and fetal ventromedial hypothalamus [1]. Details of the ROC analysis are presented in Table 1 of the manuscript.

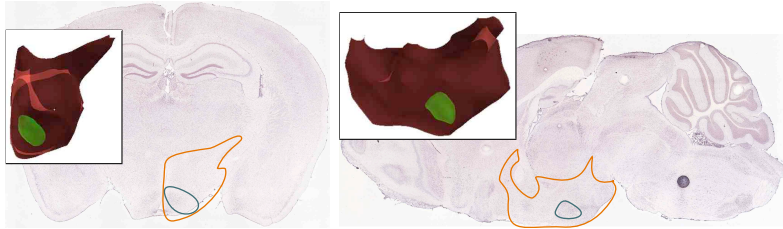

(a) G protein-activated inward rectifier potassium channel 4 (*Kcnj5*; K: 2.22, A:0; ABA images 72040834, 69890146)

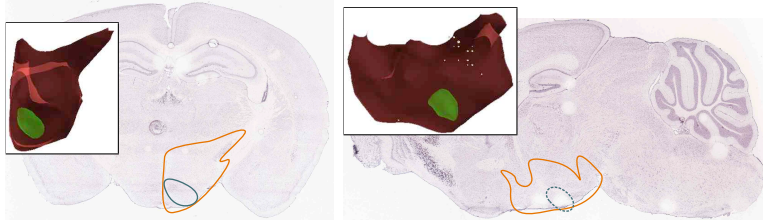

(b) Neuromedin-B receptor (*Nmb*; K: 3.30, A: 0; ABA images 77328246, 69148481)

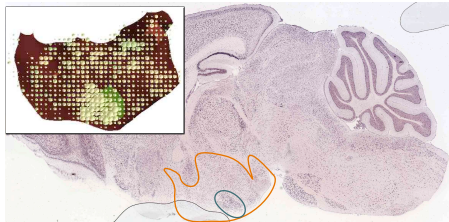

(c) Ataxin-2-binding protein 1 (*A2bp1*; K:2.4, A:0.95; ABA image 71138095)

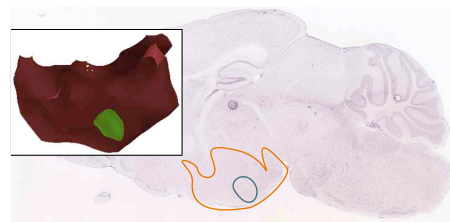

(d) Transcription cofactor vestigial-like protein 2 (*Vgl2*; K: 8.42, A: 0; ABA image 71279859)

Figure 2: Examples of ALLENMINER false negative errors. Comparison of VMH-enriched genes identified by ALLENMINER to those identified by microarray [1] suggests that ALLENMINER false negatives are caused by: (a) sub-threshold expression, (b) tissue damage, and (c) slice/registration artifacts. Some of the apparent negatives are likely to be true negatives, for example *Vgl2* (d) which has been independently shown not to express in the adult VMH [1]. The positions of the hypothalamus (orange outline) and VMH (blue outline) are depicted on the *in situ* images. The 3D registered expression (inset, yellow circles) in the hypothalamus (red) is shown along with the highlighted VMH nuclei (green). The fold enrichment observed by the microarray study (K:, [1]) and the ALLENMINER enrichment score (A:; Main Eqn 2) are listed.

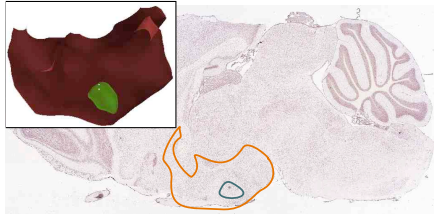

(a) F-box and leucine-rich repeat protein 7 (Fbxl7; A: 37.04; ABA image 73429295)

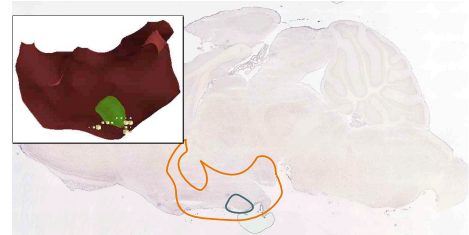

(b) Guanine nucleotide-binding protein subunit alpha 15 (Gna15; A: 17.31; ABA image 67846082)

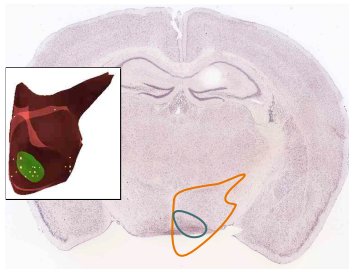

(c) Guanine nucleotide-binding protein G(olf) subunit alpha (Gnal; A: 11.88; ABA image 71514991)

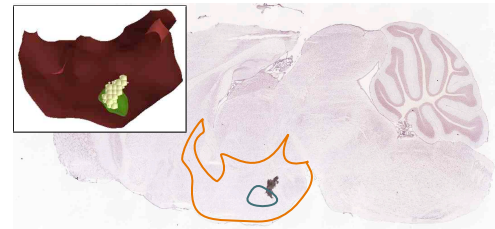

(d) Tctex1 domain containing 1 (Tctex1d1; A: 16.09; ABA image 71774899)

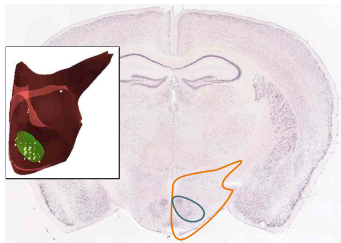

(e) Cyldromatosis (Cyld; A: 27.38; ABA image 73968005)

Figure 3: Examples of ALLENMINER false positive errors. Comparison of genes enriched in the ventromedial hypothalamus identified by ALLENMINER to those identified by microarray [1] suggests that ALLENMINER false positives are caused by (a) particulate aggregates, (b) bubble artifacts, (c) tissue damage such as folded tissue, and (d) debris on the slide. In some cases, enrichment is clearly evident on the *in situ* image and may represent a true positive that was missed by the microarray study or that is differentially expressed in the fetal VMH (e). The positions of the hypothalamus (orange outline) and VMH (blue outline) are depicted on the *in situ* images. The 3D registered expression (inset, yellow circles) in the hypothalamus (red) is shown, along with the highlighted VMH nuclei (green). The ALLENMINER enrichment score (Main Eqn 2) is listed for each gene (A:).

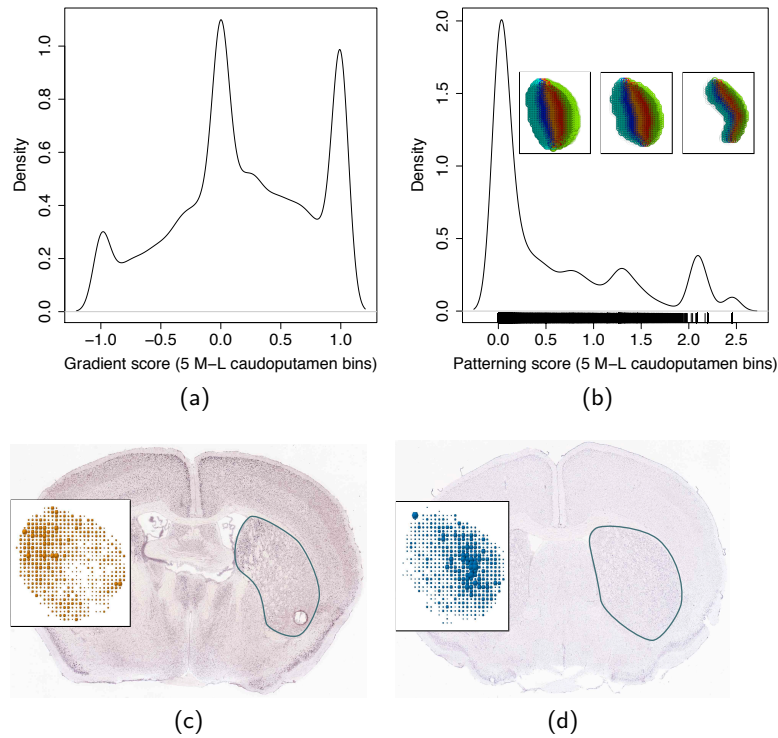

Figure 4: Patterned expression in the caudoputamen. Gradient (a; Main Eqn 3) and patterning scores (b; Main Eqn 4) were computed across five mediolateral caudoputamen bins (rainbow) for all ABA 3D expression profiles. (b) The mediolateral bins adjust to the varying width of the caudoputamen, as shown by three sections from rostral (left) to caudal (right). *In situ* images and caudoputamen voxel calls (inset) are shown for two genes with graded expression across the mediolateral axis: (c) Early growth response 2 (*Egr2*; gradient = 0.85; ABA image 72034276) and (d) Sodium- and chloride-dependent taurine transporter (*Slc6a6*; gradient = -0.72; ABA image 15241).

## List of Tables

- 1 Differences between ALLENMINER and microarray identified genes enriched in the ventromedial hypothalamus . . . . . 8

|    | Gene          | Kurrasch<br>enrichment | ALLENMINER |       |
|----|---------------|------------------------|------------|-------|
|    |               |                        | enrichment | rank  |
| 1  | Gpr149        | 4.43                   | 20.382     | 43    |
| 2  | BC034076      | 2.27                   | 20.223     | 45    |
| 3  | Fezf1         | 4.38                   | 19.158     | 54    |
| 4  | Cckbr         | 2.60                   | 12.532     | 145   |
| 5  | Ddn           | 4.29                   | 12.174     | 162   |
| 6  | Gda           | 2.81                   | 9.854      | 227   |
| 7  | Nkx2-2        | 2.94                   | 9.744      | 235   |
| 8  | Gabra5        | 2.89                   | 9.388      | 250   |
| 9  | Fbxw7         | 2.62                   | 8.728      | 280   |
| 10 | Amigo2        | 3.13                   | 8.636      | 287   |
| 11 | Nr5a1         | 7.75                   | 7.523      | 338   |
| 12 | Pdyn          | 3.16                   | 6.594      | 428   |
| 13 | Col6a3        | 2.53                   | 6.432      | 438   |
| 14 | Bdnf          | 5.37                   | 5.789      | 522   |
| 15 | Cdh4          | 2.58                   | 5.274      | 595   |
| 16 | Ldb2          | 2.65                   | 5.148      | 626   |
| 17 | Nptx2         | 6.85                   | 5.121      | 629   |
| 18 | Grhl1         | 2.24                   | 4.632      | 735   |
| 19 | Calb1         | 2.21                   | 4.311      | 819   |
| 20 | Acvr1c        | 2.44                   | 3.967      | 936   |
| 21 | Adcyap1       | 3.28                   | 2.742      | 1,578 |
| 22 | C030019I05Rik | 2.20                   | 2.235      | 2,082 |
| 23 | Tmem35        | 2.20                   | 2.024      | 2,361 |
| 24 | Tac1          | 2.36                   | 1.938      | 2,499 |
| 25 | Plp1          | 3.05                   | 1.624      | 3,156 |

(a) ALLENMINER enrichment score greater than 1.5

Table 1: Differences between ALLENMINER and microarray identified [1] genes enriched in the ventromedial hypothalamus. (a) Twenty five of the 37 genes identified by microarray received an ALLENMINER enrichment score of at least 1.5. (b) Visual inspection of *in situ* images for the remaining 12 genes suggested several potential reasons to explain their enrichment scores of less than 1.5.



| Gene          | Kurrasch enrichment | ALLENMINER enrichment | rank   | comments                                                                                                                          |
|---------------|---------------------|-----------------------|--------|-----------------------------------------------------------------------------------------------------------------------------------|
| 26 Sema3a     | 2.52                | 1.412                 | 3,764  | sub-threshold: subtle enrichment on one of three coronal data-sets; few registered voxels                                         |
| 27 Satb2      | 4.68                | 0.948                 | 5,786  | slice/registration effect: subtle VMH enrichment evident on coronal and sagittal images; no VMH voxels called                     |
| 28 A2bp1      | 2.40                | 0.946                 | 5,796  | slice/registration effect: enrichment evident on the <i>in situ</i> image; sagittal slices only catch edge of VMH                 |
| 29 Titf1      | 2.27                | 0.716                 | 6,723  | strong expression throughout hypothalamus                                                                                         |
| 30 B3gnt3     | 2.25                | 0.000                 | 11,118 | no detectable expression                                                                                                          |
| 31 B530002L08 | 6.13                | 0.000                 | 11,137 | no detectable expression                                                                                                          |
| 32 Card14     | 2.32                | 0.000                 | 11,689 | no detectable expression, elongated brain                                                                                         |
| 33 Kcnj5      | 2.22                | 0.000                 | 14,603 | sub-threshold: slight signal on coronal and sagittal <i>in situ</i> , no voxels registered                                        |
| 34 Mst1r      | 3.83                | 0.000                 | 16,453 | sub-threshold, <i>in situ</i> artifact: subtle sagittal signal, but close to artifact; no expression called                       |
| 35 Nmbr       | 3.30                | 0.000                 | 16,690 | sagittal <i>in situ</i> artifact: missing VMH tissue on sagittal section; coronal sub-threshold: very subtle signal in 1-2 slices |
| 36 Ntn2l      | 2.21                | 0.000                 | 16,783 | sub-threshold: some low level expression, few called pixels, no registered voxels                                                 |
| 37 VglI2      | 8.42                | 0.000                 | 19,791 | no detectable expression. very low expression on image, few pixels called, no registered voxels                                   |

(b) ALLENMINER enrichment score less than 1.5
